# Supplementary material for: Comparing Results of Five SARS-CoV-2 Antibody Assays Before and After the First Dose of ChAdOx1 nCoV-19 Vaccine among Health Care Workers
Source: PubMed Central journal article supplement (PMC8373005; doi:10.1128/jcm.01105-21), 2021-08-18
Supplement: jcm.01105-21-s0001.pdf [file jcm.01105-21-s0001.pdf]

# **Comparing Results of Five SARS-CoV-2 Antibody Assays Before and After the First Dose of ChAdOx1 nCoV-19 Vaccine among Health Care Workers**

Seri Jeong,<sup>a</sup> Nuri Lee,<sup>a</sup> Su Kyung Lee,<sup>b</sup> Eun-Jung Cho,<sup>b</sup> Jungwon Hyun,<sup>b</sup> Min-Jeong Park,<sup>a</sup> Wonkeun Song,<sup>a</sup> Eun Ju Jung,<sup>c</sup> Heungjeong Woo,<sup>c</sup> Yu Bin Seo,<sup>d</sup> Jin  
Ju Park,<sup>d</sup> Hyun Soo Kim<sup>b#</sup>

## **Supplementary information**

Supplemental Table 1. Quantitative median values of SARS-CoV-2 antibody assays according to the characteristics of participants

**Supplemental Table 1** Quantitative median values of SARS-CoV-2 antibody assays according to the characteristics of participants<sup>a</sup>

| Characteristics                            | Roche<br>(U/mL) | <i>P</i> -value   | Abbott<br>(AU/mL) | <i>P</i> -value | Siemens<br>(index) | <i>P</i> -value | SD<br>biosensor<br>V1 (%) | <i>P</i> -value | SD<br>biosensor<br>V2 (%) | <i>P</i> -value | GenScript<br>(%) | <i>P</i> -value |
|--------------------------------------------|-----------------|-------------------|-------------------|-----------------|--------------------|-----------------|---------------------------|-----------------|---------------------------|-----------------|------------------|-----------------|
| Sex                                        |                 | 0.070             |                   | 0.081           |                    | <b>0.035</b>    |                           | 0.184           |                           | <b>0.019</b>    |                  | 0.274           |
| Male (n = 36)                              | 12.1            |                   | 418.8             |                 | 5.4                |                 | 86.8                      |                 | 66.8                      |                 | 48.5             |                 |
| Female (n = 192)                           | 7.5             |                   | 265.3             |                 | 2.6                |                 | 79.9                      |                 | 49.8                      |                 | 39.7             |                 |
| Age                                        |                 | 0.838             |                   | 0.603           |                    | 0.552           |                           | 0.405           |                           | 0.874           |                  | 0.940           |
| 21-30 (n = 101)                            | 9.0             |                   | 306.0             |                 | 3.1                |                 | 79.9                      |                 | 52.2                      |                 | 40.3             |                 |
| 31-40 (n = 50)                             | 6.4             |                   | 329.2             |                 | 3.8                |                 | 85.5                      |                 | 53.7                      |                 | 42.9             |                 |
| 41-50 (n = 46)                             | 6.8             |                   | 225.1             |                 | 2.1                |                 | 71.5                      |                 | 47.1                      |                 | 36.7             |                 |
| 51-60 (n = 31)                             | 8.1             |                   | 280.8             |                 | 2.7                |                 | 82.3                      |                 | 55.2                      |                 | 43.9             |                 |
| Occupation                                 |                 | 0.130             |                   | <b>0.011</b>    |                    | <b>0.018</b>    |                           | <b>0.038</b>    |                           | <b>0.012</b>    |                  | <b>0.049</b>    |
| Doctor (n = 14)                            | 15.8            |                   | 531.2             |                 | 5.6                |                 | 91.6                      |                 | 68.1                      |                 | 56.7             |                 |
| Nurse (n = 154)                            | 6.4             |                   | 245.2             |                 | 2.2                |                 | 78.2                      |                 | 46.7                      |                 | 36.6             |                 |
| Medical technician (n = 58)                | 9.3             |                   | 418.8             |                 | 3.6                |                 | 83.7                      |                 | 58.6                      |                 | 43.7             |                 |
| Others (n = 2)                             | 16.0            |                   | 360.5             |                 | 4.0                |                 | 74.4                      |                 | 55.7                      |                 | 37.3             |                 |
| <b>Days after vaccination</b>              |                 | <b>&lt; 0.001</b> |                   | <b>0.002</b>    |                    | <b>0.006</b>    |                           | <b>0.005</b>    |                           | <b>0.001</b>    |                  | <b>0.001</b>    |
| 11-20 days (n = 179)                       | 6.5             |                   | 251.1             |                 | 2.6                |                 | 78.9                      |                 | 47.3                      |                 | 36.6             |                 |
| 21-28 days (n = 49)                        | 16.8            |                   | 417.0             |                 | 4.0                |                 | 88.3                      |                 | 65.0                      |                 | 49.8             |                 |
| <b>Adverse reactions after vaccination</b> |                 | <b>0.017</b>      |                   | <b>0.003</b>    |                    | <b>0.01</b>     |                           | <b>0.009</b>    |                           | <b>0.002</b>    |                  | <b>0.011</b>    |
| Absent (n = 8)                             | 1.4             |                   | 76.6              |                 | 0.7                |                 | 45.1                      |                 | 18.2                      |                 | 21.0             |                 |
| Mild (n = 152)                             | 6.4             |                   | 259.7             |                 | 2.8                |                 | 78.2                      |                 | 50.0                      |                 | 37.3             |                 |
| Severe (n = 68)                            | 10.6            |                   | 394.8             |                 | 3.4                |                 | 86.2                      |                 | 57.7                      |                 | 45.6             |                 |
| <b>Duration of adverse reactions</b>       |                 | <b>0.011</b>      |                   | <b>0.002</b>    |                    | <b>0.034</b>    |                           | <b>0.05</b>     |                           | <b>0.04</b>     |                  | <b>0.015</b>    |
| < 1 day (n = 59)                           | 5.1             |                   | 182.1             |                 | 2.2                |                 | 74.8                      |                 | 45.5                      |                 | 34.8             |                 |
| 2-3 days (n = 141)                         | 10.1            |                   | 318.3             |                 | 3.3                |                 | 85.3                      |                 | 55.5                      |                 | 44.5             |                 |
| > 4 days (n = 20)                          | 12.6            |                   | 687.6             |                 | 4.7                |                 | 84.1                      |                 | 65.8                      |                 | 60.3             |                 |
| Antipyretics                               |                 | 0.875             |                   | 0.353           |                    | 0.705           |                           | 0.594           |                           | 0.094           |                  | 0.836           |
| Not taken (n = 23)                         | 8.8             |                   | 197.9             |                 | 2.6                |                 | 76.2                      |                 | 41.7                      |                 | 35.7             |                 |
| Taken (n = 205)                            | 7.6             |                   | 284.2             |                 | 3.1                |                 | 81.6                      |                 | 52.7                      |                 | 40.8             |                 |
| Total after vaccination (n = 228)          | 7.8             |                   | 278.4             |                 | 3.0                |                 | 80.3                      |                 | 51.1                      |                 | 40.3             |                 |

<sup>a</sup>Data are expressed as medians.
